# Supplementary material for: Kraft Lignin Conversion into Energy Carriers under the Action of Electromagnetic Radiation
Source: Hindawi journal article supplement (doi:10.1155/2019/6480354), 2019-02-20
Supplement: f1 [file 6480354.f1.docx]

Figure S1.

Typical GCMS spectra of liquid products

Table S1.

Products identification according to MS.

| Apex RT | %Area | compound |
| --- | --- | --- |
| 4.12 | 34.07 | acetylacetone |
| 4.25 | 7.89 | furfural |
| 4.65 | 0.63 | ethylbenzene |
| 4.84 | 2.75 | xylene |
| 5.37 | 8.93 | xylene |
| 6.07 | 0.63 | acetylcyclopenten |
| 7.03 | 3.91 | benzaldehyde |
| 7.2 | 25.83 | acetylcyclopentadiene |
| 7.45 | 0.9 | dimethylcyclopentanone |
| 7.59 | 3.63 | phenol |
| 7.69 | 0.74 | trimethylbenzene |
| 8.3 | 0.33 | tetramethylbenzene |
| 8.53 | 0.31 | Benzyl alcohol |
| 8.6 | 0.36 | inden |
| 8.92 | 1.05 | methylphenol |
| 9.34 | 2.42 | dimethylphenol |
| 9.42 | 2.04 | guaiacol |
| 9.83 | 0.48 | dihydropyranone |
| 10.59 | 0.48 | benzopyran |
| 11.1 | 2.61 | methylguaiacol |
